# Supplementary material for: A direct urea fuel cell – power from fertiliser and waste
Source: Royal Society of Chemistry journal article supplement (doi:10.1039/b924786f), 2010-01-01
Supplement: b924786f.pdf [file b924786f.pdf]

## Electronic Supplementary Information

### A direct urea fuel cell – power from fertiliser and waste

Rong Lan <sup>a</sup>, Shanwen Tao <sup>a,\*</sup> and John T.S. Irvine <sup>b</sup>

<sup>a</sup> Department of Chemistry, Heriot-Watt University, Edinburgh EH14 4AS, UK  
Tel. +44 (0) 131 451 4299, E-mail:s.tao@hw.ac.uk

<sup>b</sup> School of Chemistry, University of St Andrews, St Andrews, Fife KY16 9ST, UK

#### Methods

In our experiments, three alkaline membrane fuel cells were constructed based on alkaline membrane electrolytes.

Preparation of alkaline membrane:

The composite membrane was made of a commercial strong anion exchange resin (AER) (Amberlite IRA78, hydroxide form, Aldrich) and polyvinyl alcohol (PVA), (MW 50,000, Aldrich) at a weight ratio of 60/40. PVA was dissolved in de-ionised water and stirred at 85°C for two hours to form a gel. After the gel was cooled down to room temperature, the commercial resin was crushed into powder in an agate mortar first then mixed with PVA gel, cast on a glass plate and dried in a vacuum oven at room temperature to form an AER-PVA blend membrane.

Cell A:

Membrane electrode assemblies (MEAs) for fuel cells measurements were fabricated with a Pt/C anodes and AER-PVA blend membrane. Pt/C (30wt%, E-TEK) was used as anode at a loading of 0.6mg/cm<sup>2</sup>. Carbon papers (Toray 090, water-proofed for anode, plain for cathode, E-TEK) were used as current collectors.

Cell B:

Nano-sized nickel was prepared from NiCl<sub>2</sub>·6H<sub>2</sub>O (Alfa, 99.3%), CrCl<sub>3</sub>·6H<sub>2</sub>O (Alfa, 99.5%) and KBH<sub>4</sub> (Alfa, 98%)(*l*). Some trisodium citrate was added into the NiCl<sub>2</sub> aqueous solution in order to obtain nano-sized nickel particles (primary particle size ~ 2 nm). The nickel was dried at room temperature only. The as-prepared nano-sized nickel was mixed with carbon (Carbot Vulcan XC-72R) at a 50/50 weight ratio to be used as anode. Nano-sized silver was prepared by a similar method to that for preparation of nickel using AgNO<sub>3</sub> (Alfa, 99.9+%) as the precursor. The silver was mixed with carbon (Cabot Vulcan XC-72R) by a weight ratio of 50/50. The loading of Ag at cathode and Ni at anode were ~20mg/cm<sup>2</sup>. The other parameters are the same as in Cell A.

Cell C:

The same Ni/C anode as in Cell B was used. 20wt% MnO<sub>2</sub>/C was prepared from KMnO<sub>4</sub> (Avacado, 99%), Mn(CH<sub>3</sub>COO)<sub>2</sub>·4H<sub>2</sub>O (Aldrich, 99.99%) and carbon (Cabot

Vulcan XC-72R) by a co-precipitation method (2). The loading of MnO<sub>2</sub> at cathode and Ni at anode were ~ 20mg/cm<sup>2</sup>. The other parameters are the same as in Cell A.

Fuel cell performance:

Urea solution at different concentrations was prepared from urea (Alfa Aesar, ACS grade) and de-ionised water. Commercial AdBlue (32.5% urea solution) supplied by a local garage. Human urine were also used as fuel for fuel cell tests. Urea solutions were pumped into the anode side by a peristaltic pump (Watson Marlow 323D). Wet air was supplied to the cathode by passing air through room temperature water. The cell area was 1cm<sup>2</sup>. A Solartron 1287A electrochemical interface coupled with a CorrWare/CorrView software was used to measure the fuel cell performance.

Thermodynamic parameters for calculation of theoretical open circuit voltage (OCV) and efficiency.

Reaction:

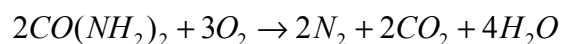

| Compounds                 | CO(NH <sub>2</sub> ) <sub>2</sub> (c) | O <sub>2</sub> (g) | N <sub>2</sub> (g) | CO <sub>2</sub> (g) | H <sub>2</sub> O(l) |
|---------------------------|---------------------------------------|--------------------|--------------------|---------------------|---------------------|
| $\Delta G_f^0$ (kcal/mol) | -47.19                                | 0                  | 0                  | -94.254             | -56.687             |
| $\Delta H_f^0$ (kcal/mol) | -79.71                                | 0                  | 0                  | -94.051             | -68.315             |
| $S^0$ (cal/K·mol)         | 25.00                                 | 49.003             | 45.77              | 51.06               | 16.71               |
| $C_p^0$ (cal/K·mol)       | 22.26                                 | 7.016              | 6.961              | 8.87                | 17.995              |

\* Data from CRC Handbook of Chemistry and Physics, Editor: R. C. Weast. 63<sup>th</sup> Edition. CRC Press, Inc. Boca Raton, Florida. 1983.

Thermodynamic value of urea dissolution in water:

| Compounds               | CO(NH <sub>2</sub> ) <sub>2</sub> dissolution |
|-------------------------|-----------------------------------------------|
| $\Delta G_f^0$ (kJ/mol) | -6.86                                         |
| $\Delta H_f^0$ (kJ/mol) | -14                                           |
| $S^0$ (J/K·mol)         | 69.5                                          |
| $C_p^0$ (J/K·mol)       | 4.31 <sup>§</sup>                             |

\* Data from:

Charles A. Liberko and Stephanie Terry, A Simplified Method for Measuring the Entropy Change of Urea Dissolution, *J. Chem. Edu.*, **78**, 1087-1088 (2001).

<sup>§</sup> Assuming heat capacity of dilute urea solution equals to that of water.

During the estimation, it has been assumed that thermal capacitances of compounds do not change in the temperature range. In a real situation, they do change but will have little contribution to free energy change.

**Table S1** Comparison of energy density of different materials.

| Compounds                             | Density<br>(g cm <sup>-3</sup> ) | Gravimetric H <sub>2</sub><br>density (% H <sub>2</sub> ) | Volumetric H <sub>2</sub><br>density (kg H <sub>2</sub> l <sup>-1</sup> ) | Energy density<br>(MJ l <sup>-1</sup> ) |
|---------------------------------------|----------------------------------|-----------------------------------------------------------|---------------------------------------------------------------------------|-----------------------------------------|
| Gaseous H <sub>2</sub>                | 0.00008988                       | 100                                                       | 0.00008988                                                                | 0.01079                                 |
| Compressed H <sub>2</sub><br>(700bar) | 0.039                            | 100                                                       | 0.039                                                                     | 5.6                                     |
| Liquid H <sub>2</sub>                 | 0.071                            | 100                                                       | 0.071                                                                     | 10.1                                    |
| NH <sub>4</sub> OH (28%)              | 0.89                             | 2.4                                                       | 0.021                                                                     | 1.17                                    |
| Liquid NH <sub>3</sub>                | 0.747                            | 17.6                                                      | 0.13                                                                      | 12.6                                    |
| CO(NH <sub>2</sub> ) <sub>2</sub>     | 1.335                            | 10.07*                                                    | 0.134                                                                     | 16.9                                    |

\* Effective density including hydrogen from water molecules for hydrolysis.

Sources: R. K. Graupner “Guanidine – Safe, Clean, and Flexible”

<http://www.energy.iastate.edu/Renewable/ammonia/ammonia/2006/OregonSustainableEnergy.pdf>

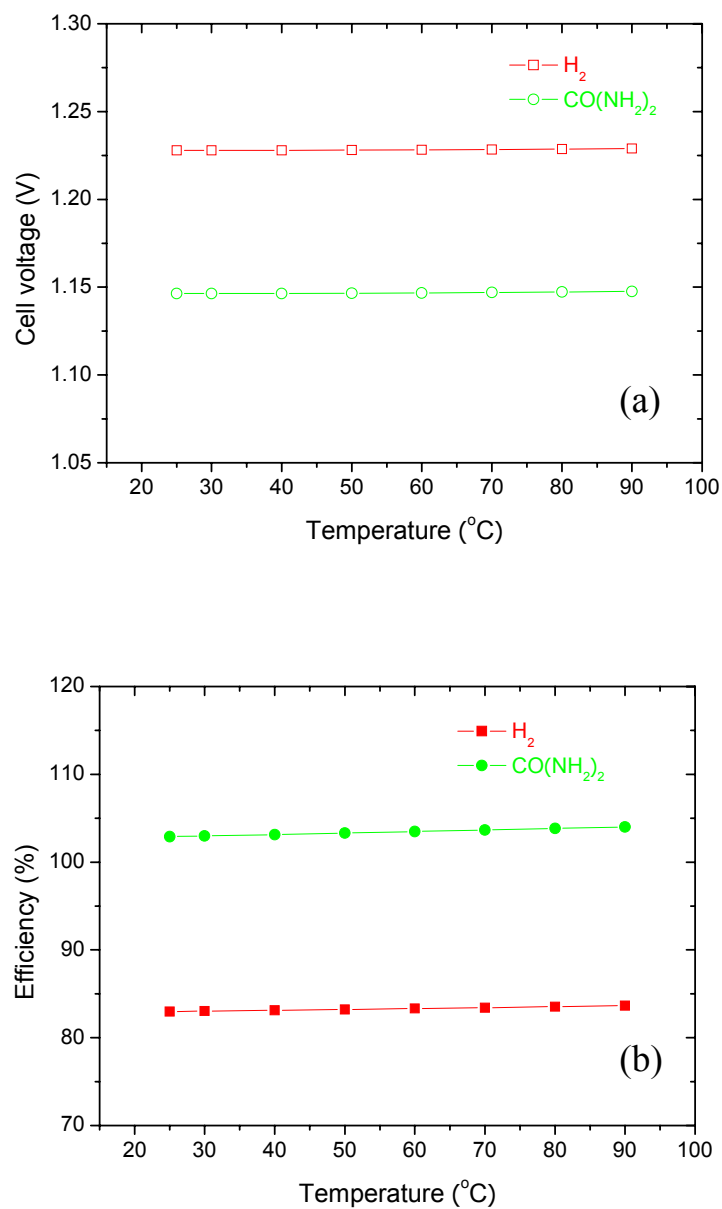

**Fig. S1 (a)**, Theoretical cell voltage of fuel cells, H<sub>2</sub> (□) and CO(NH<sub>2</sub>)<sub>2</sub> (○). **(b)**, efficiency of fuel cells H<sub>2</sub> (■), CO(NH<sub>2</sub>)<sub>2</sub> (●).

---

**References**

- 1 Lu, S. F., Pan, J., Huang, A. B., Zhuang, L. & Lu, J.T. Alkaline polymer electrolyte fuel cells completely free from noble metal catalysts. *Proc. Natl. Acad. Sci. U. S. A.*, 2008, **105**, 20611-20614.
- 2 Xu, C. J., Li, B. H., Du, H. D., Kang, F. Y. & Zeng Y. Q. Electrochemical properties of nanosized hydrous manganese dioxide synthesized by a self-reacting micromulsion method. *J. Power Sources*, 2008, **180**, 664 – 670.
